# Supplementary material for: Statistical analysis of observations of polar stratospheric clouds with a lidar in Kiruna, northern Sweden
Source: Copernicus journal article supplement (doi:10.5194/egusphere-2022-1163), 2022-11-07
Supplement: Supplementary file [file egusphere-2022-1163-AC1-supplement.pdf]

**Response to editor for manuscript**

**”Statistical analysis of observations of polar stratospheric clouds  
with a lidar in Kiruna, northern Sweden”  
P. Voelger and P. Dalin**

The manuscript was modified to include both corrections that the editor wanted.
